# Supplementary material for: Characterisation of amorphous and nanocrystalline molecular materials by total scattering
Source: Royal Society of Chemistry journal article supplement (doi:10.1039/b915453a), 2009-10-20

## Supporting Information for Manuscript:

### Characterisation of amorphous and nanocrystalline molecular materials by total scattering

Simon J. L. Billinge,\* Timur Dykhne, Pavol Juhás, Emil Božin, Ryan Taylor, Alastair Florence and Kenneth Shankland

#### 1. Sample Preparation

Data were collected from samples of CBZ and IND prepared by a melt-quenching method whereby molten compound was rapidly cooled in liquid N<sub>2</sub>, lightly ground, sieved and filled into a 1mm diameter Kapton capillary. The laboratory data shown in Figure 1 of the manuscript were collected on a Bruker-AXS D8 diffractometer using capillary transmission geometry, primary monochromated CuKα<sub>1</sub> radiation (λ = 1.54056 Å) in the range 2-40 °2θ, 0.016 °2θ step size, 10s per step at 100 K. Total scattering data were collected using the Rapid Acquisition PDF method [1]. A 2D image plate detector was placed perpendicular to the high energy X-ray beam, 198 mm behind the sample. Data were collected for 300s and this was repeated between 5 and 8 times for a total collection time of 30 minutes for each data-set.

#### 1. Data Processing and PDF Analysis

The PDF is linked to the scattering intensity through the sine Fourier transform

$$G(r) = \int_{Q_{\min}}^{\infty} F(Q) \sin QrdQ, \quad \text{Eq 1}$$

where

$$F(Q) = Q \left[ \frac{I_c(Q) + \langle f \rangle^2 - \langle f^2 \rangle}{\langle f \rangle^2} - 1 \right]. \quad \text{Eq 2}$$

Here  $Q_{\min}$  is a  $Q$  value that excludes any small angle scattering intensity but includes all the wide-angle scattering [2].  $I_c(Q)$  is the powder diffraction intensity that has been properly corrected by removing experimental artefacts, such as fluorescence, multiple scattering and Compton scattering, corrected for such effects as sample self-absorption, and normalized by the incident intensity and the number of scatterers in the sample. The quantity  $f=Z$  is the atomic scattering factor evaluated at  $Q=0$ , where  $Z$  is the atomic number. The  $\langle \dots \rangle$  indicate compositionally weighted averages over the atomic species in

the sample.

Data from the 2D detector were first reduced to a 1D intensity vs.  $Q$  by integrating around the Debye-Scherrer rings using the program Fit2D [3]. The other data-corrections to obtain  $F(Q)$  and  $G(r)$  were carried out using the program PDFgetX2 [4].

## 2. PolySnap comparison of TSPDFs

TSPDF data were converted to comma separated variable (csv) format and full-profile comparisons carried out using PolySNAP v.1.7.2 [5] over the range  $r = 3 - 20 \text{ \AA}$ . The correlation co-efficients for the profile comparisons for the carbamazepine and indomethacin samples are shown in Tables SI1 and SI2 respectively.

### 2.1 Carbamazepine

**Table SI1.** Correlation coefficients for the comparisons of CBZ TSPDF data in PolySNAP.

| 100K APS data     | CBZ-III | CBZ-I  | CBZ-melt quenched |
|-------------------|---------|--------|-------------------|
| CBZ-III           | 1       | 0.3245 | <b>0.8389</b>     |
| CBZ-I             |         | 1      | 0.5164            |
| CBZ-melt quenched |         |        | 1                 |

The highest correlation coefficient was returned for the melt-quenched CBZ sample and CBZ III [0.8389]. Overlays are shown below for each Polysnap comparison in Figures ES1-3.

**Figure ES1.** CBZ melt-quenched vs CBZ III [0.8389]

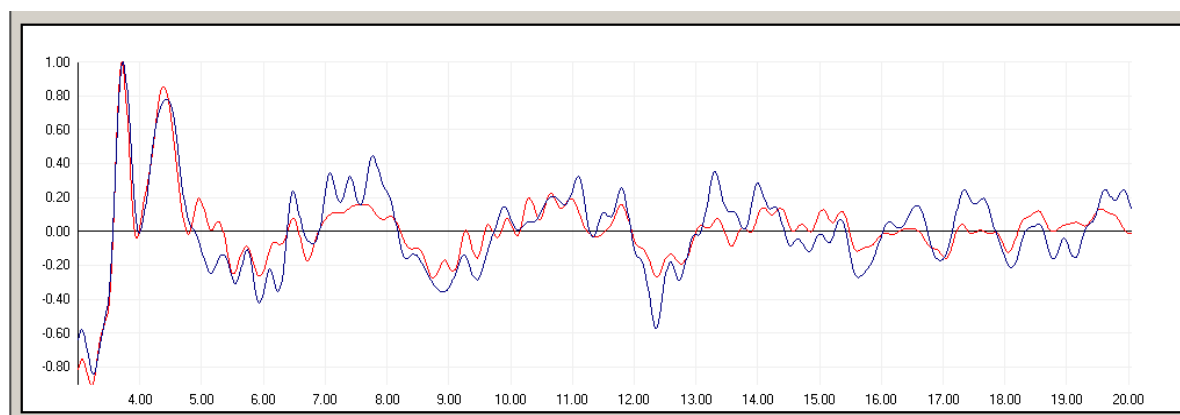

**Figure ES2.** CBZ melt-quenched vs CBZ I [0.5164]

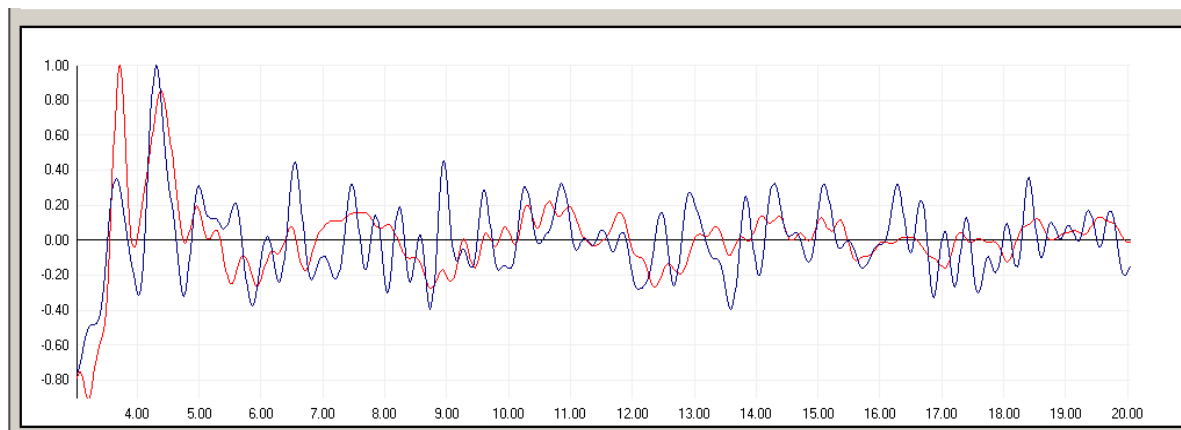

**Figure ES3.** CBZ III vs CBZ I [0.5828]

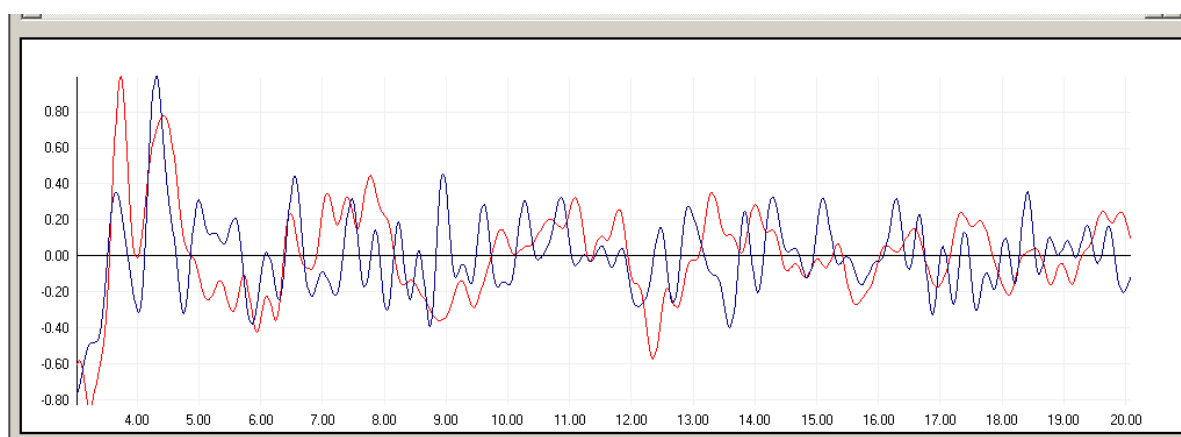

## 2.2 Indomethacin

TSPDF data were converted to csv format and full-profile comparisons carried out using PolySNAP v.1.7.2 [5] over the range  $r = 3 - 20 \text{ \AA}$ . Table SI2 below shows the correlation coefficients for the profile comparisons.

**Table SI2.** Correlation coefficients for the comparisons of IND TSPDF data in PolySNAP.

| 100K APS data     | IND-melt quenched | IND $\alpha$ | IND $\gamma$ |
|-------------------|-------------------|--------------|--------------|
| IND-melt quenched | 1                 | 0.6770       | 0.4886       |
| IND $\alpha$      |                   | 1            | 0.4057       |

|                                |  |  |          |
|--------------------------------|--|--|----------|
| <b>IND <math>\gamma</math></b> |  |  | <b>1</b> |
|--------------------------------|--|--|----------|

The highest correlation coefficient was returned for the melt-quenched IND sample and IND  $\alpha$ , but the value 0.6770 is low and does not indicate a strong correlation in this case.

Overlays are shown below for each Polysnap comparison in figures ES4-6.

**Figure ES4.** IND melt-quenched vs IND  $\alpha$  [0.6770]

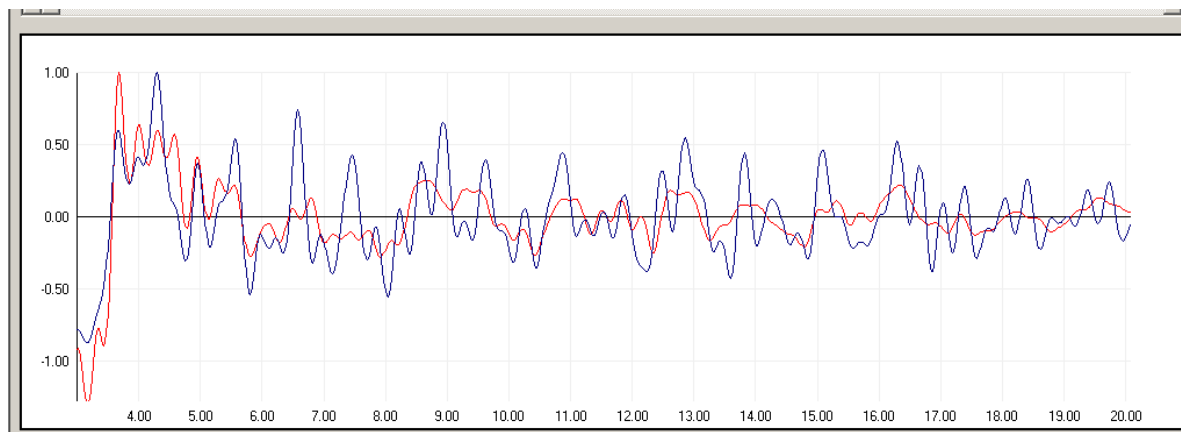

**Figure ES5.** IND melt-quenched vs IND  $\gamma$  [0.4886]

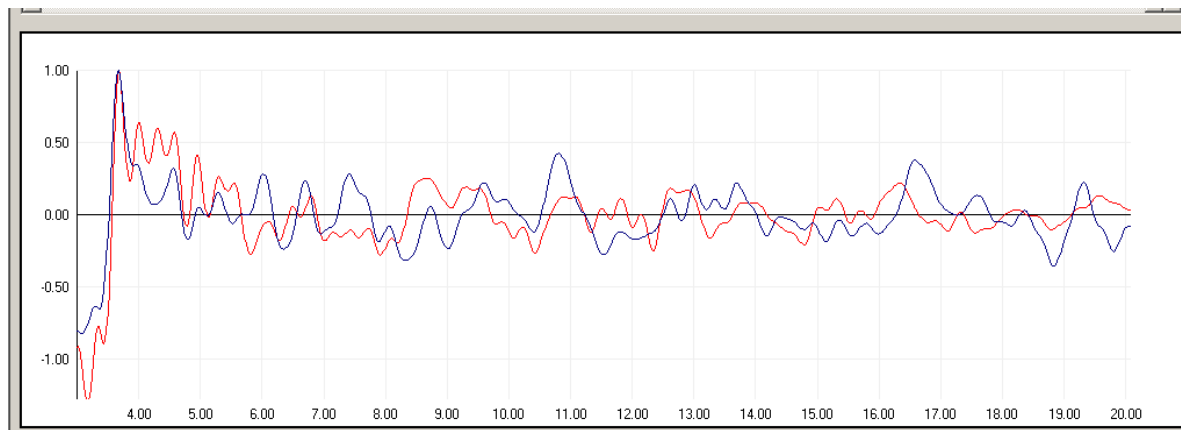

**Figure ES6.** IND  $\gamma$  vs IND  $\alpha$  [0.4057]

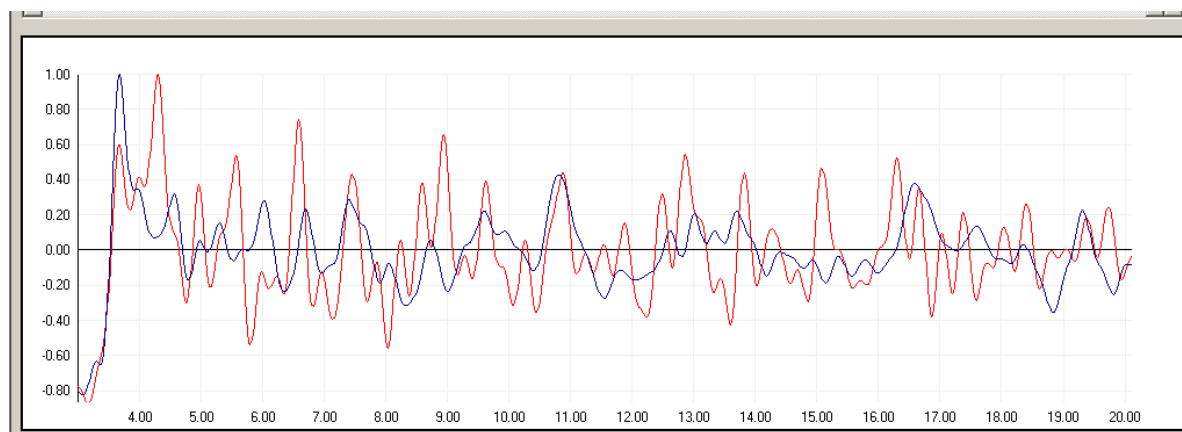

### 3. Modelling of TSPDF for particle size

The shape function defines the shape of the nanoparticle and has value 1 inside the surface and value 0 outside the surface of the particle. For spherical particles the form of the autocorrelation function, or PDF characteristic function, is

$$f(r; d) = \left[ 1 - \frac{3r}{2d} + \frac{1}{2} \left( \frac{r}{d} \right)^3 \right] \Phi(d - r), \quad \text{Eq 3}$$

where  $d$  is the diameter of the spherical particle.

To obtain Figure 3 in the manuscript, the measured TSPDF of bulk crystalline CBZ III was multiplied by Eq 3, where  $d$ , the nanoparticle diameter, was varied by hand until reasonable agreement was obtained over the whole range of  $r$  as shown.

**Table SI3.** Correlation coefficients for the comparisons of CBZ TSPDF data for the melt-quenched sample and particle size adjusted CBZ-III TSPDF in PolySNAP.

|                       |                       |                   |
|-----------------------|-----------------------|-------------------|
| 100K APS data         | CBZ-III (form factor) | CBZ-melt quenched |
| CBZ-III (form factor) | 1                     | 0.8601            |
| CBZ-melt quenched     |                       | 1                 |

**Figure ES7.** CBZ melt-quenched vs CBZ III (form factor) [0.8601]

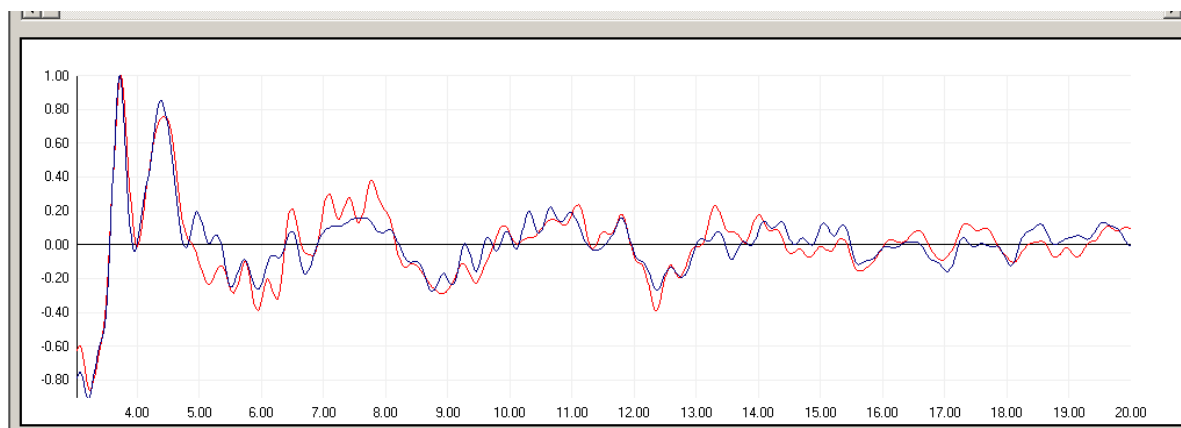

## References

- [1] P. J. Cupas, X. Qiu, J. C. Hanson, P. L. Lee, C. P. Grey and S. J. L. Billinge, *J. Appl. Cryst.*, 2003, 36, 1342-1347.
- [2] C. L. Farrow and S. J. L. Billinge, *Acta Crystallogr. A* 65, 232 (2009).
- [3] Computer code FIT2D, in A. P. Hammersley, European Synchrotron Radiation Facility, Grenoble, France, Internal Report No. ESRF98HA01T, 1998 (unpublished); see web site for details at <http://www.esrf.fr/computing/scientific/FIT2D/>
- [4] X. Qiu, J. W. Thompson and S. J. L. Billinge, *J. Appl. Cryst.*, 2004, 37, 678.
- [5] G. Barr, W. Dong and C. J. Gilmore, *J. Appl. Cryst.*, 2004, 37, 658-664.

**Electronic Supporting Information for Manuscript:**

**Erratum: Characterisation of amorphous and nanocrystalline molecular materials by total scattering**

**Simon J. L. Billinge,\* Timur Dykhne, Pavol Juhás, Emil Božin, Ryan Taylor, Alastair Florence and Kenneth Shankland**

**Table SII.** Correlation coefficients for the comparisons of CBZ TSPDF data in PolySNAP.

| <b>100K APS data</b>     | <b>CBZ-III</b> | <b>CBZ-I</b> | <b>CBZ-melt quenched</b> |
|--------------------------|----------------|--------------|--------------------------|
| <b>CBZ-III</b>           | 1              | 0.4467       | <b>0.8389</b>            |
| <b>CBZ-I</b>             |                | 1            | 0.6124                   |
| <b>CBZ-melt quenched</b> |                |              | 1                        |

**Figure ES2.** CBZ melt-quenched vs CBZ I [0.6124]

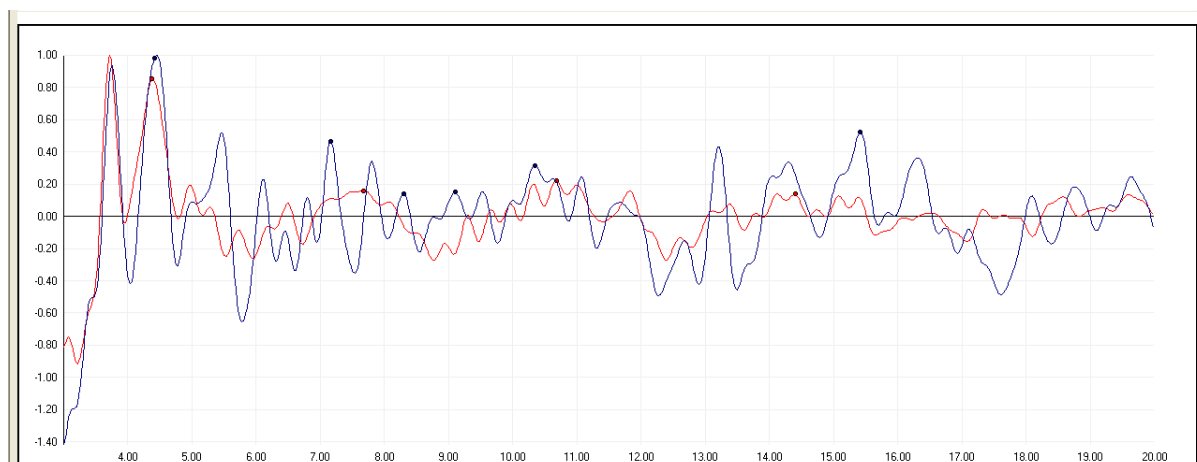

**Figure ES3.** CBZ III vs CBZ I [0.4467]

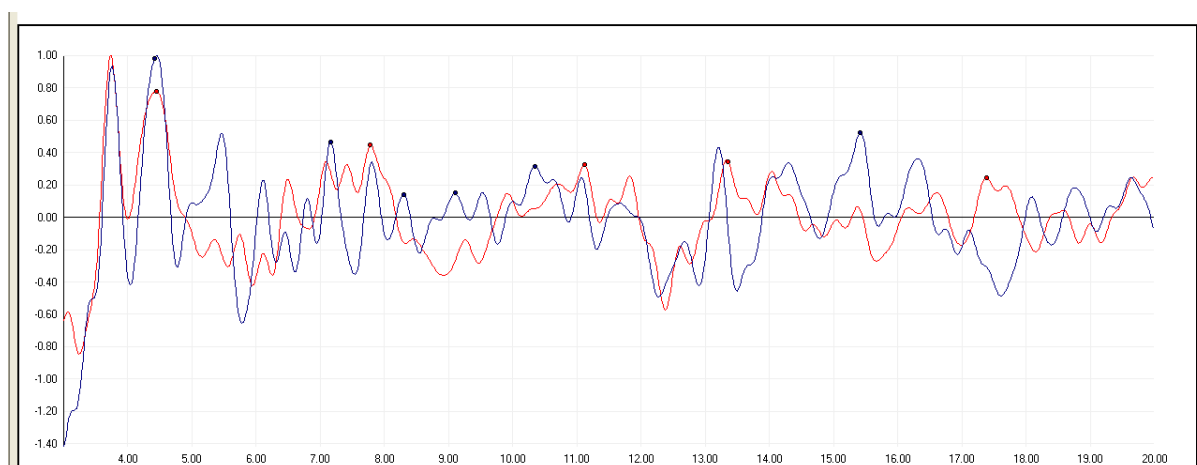

Supplement: b915453a.pdf [file b915453a.pdf]
